# Supplementary material for: Paleo-Balkan and Slavic Contributions to the Genetic Pool of Moldavians: Insights from the Y Chromosome
Source: PLoS One. 2013 Jan 16;8(1):e53731. doi: 10.1371/journal.pone.0053731 (PMC3547065; doi:10.1371/journal.pone.0053731)
Supplement: Table S1 — Frequencies of Y-chromosome haplogroups in the 28 populations included in the PCA. (XLS) [file pone.0053731.s002.xls]

## Sheet: Sheet1
Table S1. Frequencies of Y-chromosome haplogroups in the 28 populations included in the PCA.
Population	N	Code	Reference	C-M130	E-M33	E-M35* (xM78)	E-M78* (xV13)	E-V13	E-M123	G-M201* (xG15)	G-P15	H-M52	I-M253	I-M170* (xM253, P37.2, M223)	I-P37* (xM26)	I-M26	I-M223	J-M267	J-M172* (xM67, M12)	J-M67* (xM92)	J-M92	J-M12	L-M20	N-M231	Q-M242	R-SRY10831.2* (xM17)	R-M17	R-P25* (xM269)	R-M269	R-M124	T-M70
Moldavians-Karahasani	71	Md-K	Present work	0	0	0	0	0.084507	0.0422535	0	0	0	0.028169	0	0.169014	0	0.0422535	0.056338	0.028169	0.0140845	0	0	0	0.0140845	0	0	0.366197	0	0.15493	0	0
Moldavians-Sofia	54	Md-S	Present work	0	0	0	0.037	0.093	0	0	0.0188679	0	0.074	0	0.259	0	0.0188679	0.0188679	0.037	0	0	0	0	0.019	0.0188679	0	0.222	0	0.167	0	0.0188679
Romanians	54	Ro	Present work	0	0	0	0.0185185	0.0555556	0	0	0.0555556	0.0185185	0.037037	0	0.407407	0	0.0185185	0	0.0185185	0	0.0185185	0.0185185	0	0	0	0	0.203704	0	0.12963	0	0
Ukrainians-Moldova	53	Uk-M	Present work	0	0	0	0	0	0	0	0	0	0.038	0	0.208	0	0	0.019	0.038	0	0	0.038	0	0.057	0	0	0.397	0.057	0.151	0	0
Ukrainians-Ukraine	92	Uk-U	Battaglia et al. 2009	0	0	0	0	0.0758483	0.010978	0	0.0329341	0.010978	0.0219561	0	0.173653	0	0	0	0.010978	0.010978	0.010978	0.0329341	0	0.0648703	0.010978	0	0.499002	0	0.0219561	0	0.010978
Russians-Kursk	40	Ru-K	Mirabal et al. 2009	0	0	0	0	0.1	0	0	0	0	0.05	0	0.075	0	0.025	0	0.025	0	0	0	0	0.125	0	0	0.525	0	0.075	0	0
Russians-Tver	38	Ru-T	Mirabal et al. 2009	0	0	0	0	0	0.0263158	0	0	0	0.0789474	0	0.105263	0	0	0	0	0	0	0.0526316	0	0.131579	0	0	0.578947	0	0.0263158	0	0
Poles	99	Po	Battaglia et al. 2009	0	0	0	0	0.04004	0	0	0	0	0.04004	0	0.141141	0	0	0.01001	0	0	0	0.01001	0	0.01001	0	0	0.566567	0	0.182182	0	0
Czechs	75	Cz	Battaglia et al. 2009	0	0	0	0	0	0	0	0.0400802	0	0.0931864	0	0	0	0.0130261	0	0	0	0	0.0531062	0	0.0270541	0	0	0.413828	0.0130261	0.333667	0	0.0130261
Hungarians	53	Hu	Battaglia et al. 2009	0	0	0	0	0.075	0.019	0	0.019	0	0.038	0	0.094	0	0	0	0	0.019	0	0	0	0	0	0	0.566	0	0.151	0	0.019
Slovenians	75	Sl	Battaglia et al. 2009	0	0	0	0	0.027027	0	0	0.026026	0	0.0670671	0.013013	0.2002	0	0.027027	0.013013	0.013013	0	0.013013	0	0	0	0	0	0.387387	0	0.213213	0	0
Croats	89	Cr	Battaglia et al. 2009	0	0	0	0.011022	0.0671343	0.011022	0	0.011022	0	0.0901804	0	0.337675	0	0.011022	0	0.011022	0	0	0.0330661	0	0.0220441	0	0	0.270541	0	0.124248	0	0
Croats-Osijek	29	Cr-O	Battaglia et al. 2009	0	0	0	0	0.103206	0	0	0.138277	0	0	0	0.276553	0	0	0	0	0.0340681	0	0.0681363	0	0	0	0	0.37976	0	0	0	0
Croats-Bosnia	90	Cr-B	Battaglia et al. 2009	0	0	0	0	0.0890891	0	0	0.011011	0	0	0	0.733734	0	0	0	0.011011	0	0	0.011011	0	0	0	0	0.122122	0	0.022022	0	0
Serbs	103	Se	Regueiro et al. 2012	0	0	0.01	0.02	0.155	0	0	0.058	0	0.078	0	0.291	0	0.01	0.01	0.02	0.01	0.01	0.029	0	0.019	0	0	0.204	0	0.077	0	0
Serbs-Bosnia	81	Se-B	Battaglia et al. 2009	0	0	0.0249501	0	0.197605	0	0	0.011976	0	0.0249501	0.0249501	0.345309	0	0.011976	0.011976	0.0249501	0	0	0.0618762	0	0.0618762	0	0	0.135729	0	0.0618762	0	0
Bosniacs	84	Bo	Battaglia et al. 2009	0	0	0	0	0.130608	0	0	0.0358923	0	0.0478564	0	0.451645	0	0	0.0239282	0.0239282	0.0478564	0.0119641	0.0358923	0	0	0	0	0.154536	0	0.0358923	0	0
Albanians	55	Al	Battaglia et al. 2009	0	0	0	0.0180542	0.23671	0	0	0.0180542	0	0.0361083	0	0.145436	0	0.0361083	0.0361083	0	0.0361083	0.0180542	0.145436	0	0	0	0	0.0912738	0	0.182548	0	0
Albanians-FYROM	64	Al-M	Battaglia et al. 2009	0	0	0	0.0159363	0.342629	0.0308765	0	0.0159363	0	0.0468127	0	0.109562	0.0159363	0	0.062749	0	0.0159363	0	0.140438	0	0	0	0	0.0159363	0	0.187251	0	0
Greeks	92	Gr	Battaglia et al. 2009	0.010978	0	0	0.0329341	0.162675	0.0219561	0	0.0329341	0	0.0219561	0.010978	0.0648703	0	0	0.0219561	0.0439122	0.0429142	0.0329341	0.0868263	0.010978	0	0	0	0.162675	0.0219561	0.173653	0	0.0429142
Greeks-Macedonia	57	Gr-M	Battaglia et al. 2009	0	0	0	0.0179462	0.192423	0.0179462	0	0.0179462	0.0179462	0.0877368	0.0348953	0.174477	0	0	0.0179462	0.0528415	0.0348953	0	0.0528415	0	0	0	0.0179462	0.104686	0	0.139581	0	0.0179462
Greeks-Nea Nikomedeia	57	Gr-NN	King et al. 2008 and King et al. 2011	0	0	0.0175439	0.0175439	0.140351	0.0175439	0.0350877	0	0	0.0175439	0	0.0877193	0	0.0175439	0.105263	0.0175439	0	0.0175439	0.0701754	0.0175439	0	0	0	0.210526	0	0.192982	0	0.0175439
Greeks-Sesklo/Dimini	57	Gr-SD	King et al. 2008 and King et al. 2011	0	0	0.0175439	0.0350877	0.350877	0	0.0175439	0.0350877	0	0.0350877	0	0.0701754	0	0.0350877	0.0350877	0.0350877	0.0350877	0.0175439	0.0877193	0	0	0	0	0.105263	0	0.0526316	0.0175439	0.0175439
Greeks-Lerna/Franchthi Cave	57	Gr-LF	King et al. 2008 and King et al. 2011	0	0	0	0	0.350877	0	0.0175439	0.0350877	0	0.0175439	0.0526316	0.122807	0	0.0175439	0.0175439	0.0701754	0.0526316	0.0175439	0.0175439	0	0.0175439	0	0	0.0175439	0	0.157895	0	0.0175439
Turks-North-West	52	Tu-NW	King et al. 2008 and King et al. 2011	0	0	0	0	0.115385	0.0384615	0.0384615	0	0.0192308	0.0576923	0.0192308	0.0192308	0	0.0192308	0.153846	0.173077	0.0769231	0.0576923	0	0	0	0	0	0.0384615	0.0192308	0.115385	0.0192308	0.0192308
Italians-North-East	67	It-NE	Battaglia et al. 2009	0	0.0149402	0	0	0.0149402	0.0149402	0	0.118526	0	0.0896414	0	0	0	0.0149402	0	0.059761	0.059761	0.0149402	0	0.0448207	0	0	0	0.103586	0	0.416335	0	0.0328685
Sicilians-West	112	Si-W	Di Gaetano et al. 2009	0	0	0.0164016	0.0245025	0.0655066	0.0246025	0	0.0410041	0	0.0820082	0.0164016	0	0.0164016	0.00820082	0.0410041	0.122812	0.0246025	0.00820082	0.0820082	0.00820082	0	0.0246025	0	0.0574057	0	0.30333	0	0.0328033
Sicilians-East	114	Si-E	Di Gaetano et al. 2009	0	0	0.0263079	0.0877263	0.0526158	0.0702211	0.00880264	0.0702211	0	0.0175053	0	0	0.00880264	0	0.0351105	0.184155	0.0526158	0.0175053	0.0263079	0	0	0.0263079	0	0.0526158	0	0.184255	0	0.0789237
References
Battaglia V, Fornarino S, Al-Zahery N, Olivieri A, Pala M, Myres NM, King RJ, Rootsi S, Marjanovic D, Primorac D et al.: Y-chromosomal evidence of the cultural diffusion of agriculture in Southeast Europe. Eur J Hum Genet 2009; 17(6): 820-830.
Di Gaetano C, Cerutti N, Crobu F, Robino C, Inturri S, Gino S, Guarrera S, Underhill PA, King RJ, Romano V, Cali F, Gasparini M, Matullo G, Salerno A, Torre C, Piazza A: Differential Greek and northern African migrations to Sicily are supported by genetic evidence from the Y chromosome. Eur J Hum Genet 2009; 17(1):91-9. Eur J Hum Genet 2009; 17(1): 91-9. Eur J Hum Genet. 2009; 17(1): 91-9.
King R, Ozcan S, Carter T, Kalfoğlu E, Atasoy S, Triantiphyllidis C, Kouvatsi A, Lin A, Chow CE, Zhivotovsky L et al.: Differential Y Chromosome Influences on the Greek and Cretan Neolithic. Ann Hum Genet 2008; 72(Pt 2): 205-214.
King RJ, Di Cristofaro J, Kouvatsi A, Triantaphyllidis C, Scheidel W, Myres NM, Lin AA, Eissautier A, Mitchell M, Binder D, Semino O, Novelletto A, Underhill PA, Chiaroni J: The coming of the Greeks to Provence and Corsica: Y-chromosome models of archaic Greek colonization of the western Mediterranean. BMC Evol Biol 2011; 11: 69.
Mirabal S, Regueiro M, Cadenas AM, Cavalli-Sforza LL, Underhill PA, Verbenko DA, Limborska SA, Herrera RJ: Y-chromosome distribution within the geo-linguistic landscape of northwestern Russia. Eur J Hum Genet 2009; 17(10): 1260-73.
Regueiro M, Rivera L, Damnjanovic T, Lukovic L, Milasin J, Herrera RJ: High levels of Paleolithic Y-chromosome lineages characterize Serbia. Gene 2012; 498(1): 59-67.
