# Supplementary material for: Paleo-Balkan and Slavic Contributions to the Genetic Pool of Moldavians: Insights from the Y Chromosome
Source: PLoS One. 2013 Jan 16;8(1):e53731. doi: 10.1371/journal.pone.0053731 (PMC3547065; doi:10.1371/journal.pone.0053731)
Supplement: Table S3 — Reference populations used in the MDS and AMOVA analyses. (XLS) [file pone.0053731.s004.xls]

## Sheet: Sheet1
Table S3. Reference populations used in the MDS and AMOVA analyses.
Geographical Region, country	Population	Reference	Code	No. of chromosomes	No. haplotypes	Gene diversity	Mean number of pairwise differences
Moldova Republic	Moldavians_Karahasani	Present study	Md-K	71	53	0.9887 +/- 0.0050	5.563380 +/- 2.704351
Moldova Republic	Moldavians_Sofia	Present study	Md-S	54	47	0.9937 +/- 0.0053	5.719078 +/- 2.782363
Southeastern Europe/Romania	Romanians_Eastern	Prezent study	Ro-E	54	40	0.9846 +/- 0.0074	5.671558 +/- 2.761643
Southeastern Europe/Romania	Romanians_Southeastern	Stanciu et al. 2010	Ro-SE	122	98	0.9949 +/- 0.0022	5.962742 +/- 2.863689
Southeastern Europe/Romania	Romanians_Ploiesti	Bosch et al. 2006	Ro-P	36	35	0.9984 +/- 0.0070	5.812698 +/- 2.845537
Southeastern Europe/Romania	Romanians_Constanta	Bosch et al. 2006	Ro-C	31	29	0.9957 +/- 0.0095	6.167742 +/- 3.013113
Southeastern Europe/Romania	Romanians_Bihor	Bembea et al. 2011	Ro-B	73	55	0.9901 +/- 0.0043	5.982877 +/- 2.885610
Southeastern Europe/Balkans	Greeks_North	Kovatsi et al. 2009	Gr	191	148	0.9943 +/- 0.0020	5.924056 +/- 2.840000
Southeastern Europe/Balkans	Albanians_Chegs	Ferri et al. 2010	Al-Ch	165	88	0.9654 +/- 0.0073	5.318773 +/- 2.580732
Southeastern Europe/Balkans	Albanians_Tosks	Ferri et al. 2010	Al-T	121	92	0.9910 +/- 0.0035	5.843939 +/- 2.812518
Southeastern Europe/Balkans	Macedonians	Jakovski et al. 2011	Ma	262	164	0.9880 +/- 0.0032	5.579655 +/- 2.688372
Southeastern Europe/Balkans	Montenegrins	Mirabal et al. 2010	Mo	404	187	0.9869 +/- 0.0016	5.428715 +/- 2.620445
Southeastern Europe/Balkans	Serbs	Mirabal et al. 2010	Se	179	118	0.9901 +/- 0.0024	5.348817 +/- 2.592689
Southeastern Europe/Balkans	Serbs_Vojvodina	Veselinovic et al. 2008	Se-V	185	127	0.9904 +/- 0.0024	5.747650 +/- 2.764348
Southeastern Europe/Balkans	Croats_Central, Northern, Eastern, Western	Mrsic et al. 2012	Cr	880	454	0.9940 +/- 0.0007	5.675419 +/- 2.723613
Southeastern Europe/Balkans	Croatians_Southern	Mrsic et al. 2012	Cr-S	220	134	0.9886 +/- 0.0024	5.115401 +/- 2.489765
Eastern/Central Europe/Moldova Republic	Ukrainians_Moldova	Present study	Uk	53	46	0.9949 +/- 0.0047	5.957184 +/- 2.887006
Eastern/Central Europe	Russians	Roewer et al. 2007	Ru	545	329	0.9924 +/- 0.0013	5.669212 +/- 2.722506
Eastern/Central Europe	Belorussians_Northwestern, Central, Eastern, Southern	Rebala et al. 2011	Be	310	198	0.9925 +/- 0.0015	5.494227 +/- 2.650278
Eastern/Central Europe	Poles_Northeastern	Pepinski et al. 2004	Po-NE	186	174	0.9991 +/- 0.0007	5.753037 +/- 2.766605
Eastern/Central Europe	Poles_Central	Soltyszewski et al. 2007	Po-C	255	191	0.9946 +/- 0.0014	5.472904 +/- 2.642609
Eastern/Central Europe	Poles_Southern	Wozniak et al. 2007	Po-S	226	155	0.9909 +/- 0.0023	5.590718 +/- 2.694488
Eastern/Central Europe	Slovakians_Eastern	Petrejcikova et al. 2011	Sk	629	400	0.9966 +/- 0.0005	5.959439 +/- 2.846690
Eastern/Central Europe	Czechs	Zastera et al. 2010	Cz	1750	901	0.9963 +/- 0.0003	6.021386 +/- 2.870906
Italy	Italians_Northeastern	Turrina et al. 2006	It-NE	155	129	0.9964 +/- 0.0015	6.064600 +/- 2.903482
Italy	Italians_Modena	Ferri et al. 2009	It-Mo	130	109	0.9938 +/- 0.0030	5.423017 +/- 2.629295
Italy	Italians_Romagna	Ferri et al. 2008	It-R	163	140	0.9970 +/- 0.0013	6.163902 +/- 2.945535
Italy	Italians_Brescia	Cerri et al. 2005	It-B	104	80	0.9873 +/- 0.0052	5.418596 +/- 2.631585
Italy	Italians_Marches	Onofri et al. 2007	It-Ma	162	133	0.9970 +/- 0.0012	6.322291 +/- 3.013903
References
Bembea M, Patocs A, Kozma K, Jurca C, Skrypnyk C: Y-chromosome STR haplotype diversity in three ethnically isolated population from North-Western Romania. Forensic Sci Int Genet 2011; 5(3): e99-100.
Bosch E, Calafell F, Gonzalez-Neira A, Flaiz C, Mateu E, Scheil HG, Huckenbeck W, Efremovska L, Mikerezi I, Xirotiris N et al.: Paternal and maternal lineages in the Balkans show a homogeneous landscape over linguistic barriers, except for the isolated Aromuns. Ann Hum Genet 2006; 70(Pt 4): 459-487.
Cerri N, Verzeletti A, Bandera B, De Ferrari F: Population data for 12 Y-chromosome STRs in a sample from Brescia (northern Italy). Forensic Sci Int 2005; 152(1): 83-7.
Ferri G, Alù M, Corradini B, Radheshi E, Beduschi G: Slow and fast evolving markers typing in Modena males (North Italy). Forensic Sci Int Genet 2009; 3(2): e31-3.
Ferri G, Ceccardi S, Lugaresi F, Bini C, Ingravallo F, Cicognani A, Falconi M, Pelotti S: Male haplotypes and haplogroups differences between urban (Rimini) and rural area (Valmarecchia) in Romagna region (North Italy). Forensic Sci Int 2008; 175(2-3): 250-5.
Ferri G, Tofanelli S, Alù M, Taglioli L, Radheshi E, Corradini B, Paoli G, Capelli C, Beduschi G: Y-STR variation in Albanian populations: implications on the match probabilities and the genetic legacy of the minority claiming an Egyptian descent. Int J Legal Med 2010; 124(5): 363-70.
Jakovski Z, Nikolova K, Jankova-Ajanovska R, Marjanovic D, Pojskic N, Janeska B: Genetic data for 17 Y-chromosomal STR loci in Macedonians in the Republic of Macedonia. Forensic Sci Int Genet 2011; 5(4): e108-11. Epub 2011 May 5.
Kovatsi L, Saunier JL, Irwin JA: Population genetics of Y-chromosome STRs in a population of Northern Greeks. Forensic Sci Int Genet 2009; 4(1): e21-2.
Mirabal S, Varljen T, Gayden T, Regueiro M, Vujovic S, Popovic D, Djuric M, Stojkovic O, Herrera RJ: Human Y-chromosome short tandem repeats: a tale of acculturation and migrations as mechanisms for the diffusion of agriculture in the Balkan Peninsula. Am J Phys Anthropol 2010; 142(3): 380-90.
Mršić G, Gršković B, Vrdoljak A, Popović M, Valpotić I, Anđelinović Š, Stenzl V, Ehler E, Urban L, Lacković G, Underhill P, Primorac D: Croatian national reference Y-STR haplotype database. Mol Biol Rep 2012; 39(7): 7727-41.
Onofri V, Alessandrini F, Turchi C, Fraternale B, Buscemi L, Pesaresi M, Tagliabracci A: Y-chromosome genetic structure in sub-Apennine populations of Central Italy by SNP and STR analysis. Int J Legal Med 2007; 121(3): 234-7.
Pepinski W, Niemcunowicz-Janica A, Ptaszynska-Sarosiek I, Skawronska M, Koc-Zorawska E, Janica J, Soltyszewski I: Population genetics of Y-chromosome STRs in a population of Podlasie, Northeastern Poland. Forensic Sci Int 2004; 144(1): 77-82.
Rebała K, Tsybovsky IS, Bogacheva AV, Kotova SA, Mikulich AI, Szczerkowska Z: Forensic analysis of polymorphism and regional stratification of Y-chromosomal microsatellites in Belarus. Forensic Sci Int Genet 2011; 5(1): e17-20.
Roewer L, Willuweit S, Krüger C, Nagy M, Rychkov S, Morozowa I, Naumova O, Schneider Y, Zhukova O, Stoneking M, Nasidze I: Analysis of Y chromosome STR haplotypes in the European part of Russia reveals high diversities but non-significant genetic distances between populations. Int J Legal Med 2008; 122(3): 219-23.
Soltyszewski I, Pepinski W, Spolnicka M, Kartasinska E, Konarzewska M, Janica J: Y-chromosomal haplotypes for the AmpFlSTR Yfiler PCR Amplification Kit in a population sample from Central Poland. Forensic Sci Int 2007; 168(1): 61-7.
Stanciu F, Cuţăr V, Pîrlea S, Stoian V, Stoian IM, Sevastre O, Popescu OR: Population data for Y-chromosome haplotypes defined by 17 STRs in South-East Romania. Leg Med (Tokyo) 2010; 12(5): 259-64.
Turrina S, Atzei R, De Leo D: Y-chromosomal STR haplotypes in a Northeast Italian population sample using 17plex loci PCR assay. Int J Legal Med 2006; 120(1): 56-9.
Veselinovic IS, Zgonjanin DM, Maletin MP, Stojkovic O, Djurendic-Brenesel M, Vukovic RM, Tasic MM: Allele frequencies and population data for 17 Y-chromosome STR loci in a Serbian population sample from Vojvodina province. Forensic Sci Int 2008; 176(2-3): e23-8.
Woźniak M, Grzybowski T, Starzyński J, Marciniak T: Continuity of Y chromosome haplotypes in the population of Southern Poland before and after the Second World War. Forensic Sci Int Genet 2007; 1(2): 134-40.
Zastera J, Roewer L, Willuweit S, Sekerka P, Benesova L, Minarik M: Assembly of a large Y-STR haplotype database for the Czech population and investigation of its substructure. Forensic Sci Int Genet 2010; 4(3): e75-8.
