# Supplementary material for: Paleo-Balkan and Slavic Contributions to the Genetic Pool of Moldavians: Insights from the Y Chromosome
Source: PLoS One. 2013 Jan 16;8(1):e53731. doi: 10.1371/journal.pone.0053731 (PMC3547065; doi:10.1371/journal.pone.0053731)
Supplement: Table S4 — RST distances among 29 populations based on Y–STR haplotypes. (XLS) [file pone.0053731.s005.xls]

## Sheet: Sheet1
Table S4. RST distances among 29 populations (Table S3) based on Y–STR haplotypes.
	Md-K	Md-S	Ro-E	Ro-SE	Ro-P	Ro-C	Ro-B	Gr	Al-Ch	Al-T	Ma	Mo	Se	Se-V	Cr	Cr-S	Uk	Ru	Be	Po-NE	Po-C	Po-S	Sk	Cz	It-NE	It-Mo	It-R	It-B
Md-S	0.006
Ro-E	0.02071	0.0047
Ro-SE	0.06653*	0.02674	0.0531*
Ro-P	0.09901*	0.03743	0.03899	0.00683
Ro-C	0.07834*	0.0188	0.00978	0.03522	0.00519
Ro-B	0.01422	-0.00199	0.02689	0.00839	0.03468	0.03661
Gr	0.07018*	0.0383*	0.07103*	0.00196	0.02511	0.06351*	0.01502
Al-Ch	0.17156*	0.12657*	0.18815*	0.06999*	0.11465*	0.17286*	0.09*	0.03786*
Al-T	0.08448*	0.042	0.08618*	0.00653	0.03116	0.07287*	0.01985	0.00299	0.02335
Ma	0.06443*	0.03248*	0.05723*	0.00833	0.0218	0.05789	0.01226	0.00318	0.0492*	0.00909
Mo	0.06602*	0.02778	0.05404*	0.00428	0.01637	0.0415	0.0103	0.00804	0.05265*	0.00695	0.00324
Se	0.03896	0.00588	0.01494	0.0108	0.00376	0.01694	0.00743	0.02583*	0.1019*	0.02801	0.01351	0.01039
Se-V	0.03648*	0.00578	0.01637	0.00816	0.00477	0.02229	0.00287	0.02008*	0.09178*	0.02194	0.00874	0.00807	-0.00406
Cr	0.02456	0.00349	0.00141	0.02885*	0.0209	0.02297	0.01185	0.04817*	0.12746*	0.05093*	0.02834*	0.02806*	0.00187	0.00239
Cr-S	0.07018*	0.03763*	-0.0003	0.07077*	0.03223	0.00993	0.05843*	0.09273*	0.20352*	0.10956*	0.0691*	0.06295*	0.02549*	0.02918*	0.01698*
Uk	0.01217	0.00485	0.03771	0.05127*	0.07516*	0.0598	0.01139	0.06661*	0.15451*	0.06332*	0.07283*	0.05989*	0.03857	0.03626*	0.03473*	0.08688*
Ru	0.01378	0.03347	0.06223*	0.09698*	0.13117*	0.12416*	0.05268*	0.11076*	0.19205*	0.11322*	0.10976*	0.10712*	0.07624*	0.07631*	0.06441*	0.11387*	0.01891
Be	0.00709	0.03407	0.04217*	0.10655*	0.13085*	0.11561*	0.05615*	0.12305*	0.22263*	0.13074*	0.11543*	0.11279*	0.07156*	0.07205*	0.05044*	0.09304*	0.02166	0.00602
Po-NE	0.0076	0.03671*	0.04961*	0.11706*	0.13881*	0.11882*	0.06127*	0.12992*	0.22422*	0.13592*	0.12544*	0.12486*	0.08077*	0.08223*	0.06376*	0.10617*	0.02555	0.00873	0.0001
Po-C	0.01567	0.04889*	0.04919*	0.13889*	0.15613*	0.13205*	0.07865*	0.15152*	0.24871*	0.1598*	0.14117*	0.14239*	0.09428*	0.09399*	0.06846*	0.10427*	0.03633	0.02094*	0.00436	0.00126
Po-S	0.01046	0.03173	0.05344*	0.11748*	0.14861*	0.11982*	0.05837*	0.12953*	0.22275*	0.13506*	0.12486*	0.12457*	0.0854*	0.08339*	0.06356*	0.11256*	0.01973	0.01337	0.00727	0.00344	0.005
Sk	-0.00139	0.00245	0.02002	0.05628*	0.0769*	0.06605*	0.01683	0.07196*	0.14897*	0.07292*	0.06244*	0.06319*	0.03354*	0.03243*	0.02284*	0.06114*	0.00569	0.01374*	0.00909*	0.01422	0.02019*	0.00957
Cz	0.01332	0.01293	0.0555*	0.07113*	0.10802*	0.09083*	0.02238*	0.08533*	0.13977*	0.07544*	0.07704*	0.0729*	0.05516*	0.053*	0.04866*	0.09962*	0.00153	0.02426*	0.02945*	0.02908*	0.04139*	0.0164*	0.01123*
It-NE	0.13498*	0.08058*	0.1568*	0.08933*	0.13658*	0.11491*	0.07369*	0.09788*	0.12613*	0.07777*	0.12069*	0.09475*	0.11572*	0.1108*	0.13836*	0.1986*	0.06884*	0.1448*	0.17536*	0.1691*	0.19822*	0.15077*	0.11515*	0.07464*
It-Mo	0.22731*	0.17984*	0.27235*	0.19668*	0.27134*	0.23736*	0.16422*	0.18832*	0.21302*	0.17432*	0.22223*	0.18577*	0.22364*	0.21461*	0.23716*	0.31215*	0.14375*	0.21753*	0.26176*	0.24886*	0.27931*	0.23241*	0.19473*	0.13608*	0.02909
It-R	0.1491*	0.09918*	0.1784*	0.09635*	0.14815*	0.13738*	0.08044*	0.09699*	0.10973*	0.07738*	0.12136*	0.09688*	0.12794*	0.12174*	0.15581*	0.21827*	0.0851*	0.1663*	0.19816*	0.19032*	0.22156*	0.17553*	0.13583*	0.0927*	0.00013	0.02025
It-B	0.20377*	0.15298*	0.24108*	0.18087*	0.24353*	0.20112*	0.14396*	0.17948*	0.22134*	0.16798*	0.20967*	0.1737*	0.20022*	0.19281*	0.21407*	0.28156*	0.11928*	0.20113*	0.23877*	0.22359*	0.2537*	0.20794*	0.17459*	0.11915*	0.02353	-0.00014	0.02003
It-Ma	0.141*	0.08732*	0.16003*	0.04798*	0.10452*	0.11551*	0.05796*	0.04275*	0.06604*	0.03772*	0.073*	0.05832*	0.09749*	0.08998*	0.12843*	0.19341*	0.09677*	0.16174*	0.19496*	0.19419*	0.22641*	0.18249*	0.12575*	0.10129*	0.02727*	0.09126*	0.02117	0.09249*
Significant differences (RST) at 5% level are shaded.
* Significant differences (RST) at 5% after control for multiple comparisons (Holm-Bonferroni method).
